# Supplementary material
Source: Research Square preprint supplement (doi:10.21203/rs.3.rs-8950642/v1)
Supplement: Supplementary file 1 [file 086266322294ea2d4e6c6990.docx]

| **Table 1. Length of Estrous Phases in Young Adult and Adult HS Rats and Adult Wistar Rats (in hours)** | | | | |
| --- | --- | --- | --- | --- |
| Estrous phase | Statistical Test | Cycle Length (hours) | | |
| Young Adult HS  (7 – 8 weeks) | Adult HS  (10 – 11 weeks) | Adult Wistars  (10 – 11 weeks) |
| Proestrus | *Mean ± SEM* | 18.33 ± 1.19# | 27.25 ± 2.59 | 12 ± 0 |
| *Median* | 17 | 24 | 12 |
| *Range* | 7 – 57 | 15 – 56 | 12 – 12 |
| Estrus | *Mean ± SEM* | 19.68 ± 1.40# | 10.38 ± 0.78 | 22 ± 6.51 |
| *Median* | 16 | 9 | 12 |
| *Range* | 7 – 63 | 7 – 17 | 12 - 48 |
| Metestrus | *Mean ± SEM* | 9.09 ± 0.36 | 7.87 ± 0.35 | 16 ± 4 |
| *Median* | 8 | 7 | 12 |
| *Range* | 7 – 24 | 7 – 15 | 12 – 36 |
| Diestrus | *Mean ± SEM* | 8.71 ± 0.48 | 7.57 ± 0.20 | 12 ± 0 |
| *Median* | 7 | 7 | 12 |
| *Range* | 7 – 31 | 7 – 9 | 12 – 12 |

***Table 1. Length of Estrous Phases in Young Adult and Adult HS Rats and Adults Wistar Rats (in hours).*** *Average and range of rats were in each phase of the estrous cycle. Data are expressed as mean ± SEM, the median, or ranges. Young adults (n = 81), adult (n = 24), and Wistar (n = 10) rats. (# p < 0.05 Young Adult vs. Adult HS rats; Holm Sidak’s)*
