# Supplementary material
Source: Research Square preprint supplement (doi:10.21203/rs.3.rs-8950642/v1)
Supplement: Supplementary file 2 [file 1de5099a07d3936027e659d0.docx]

***Supplemental Figure 1.*
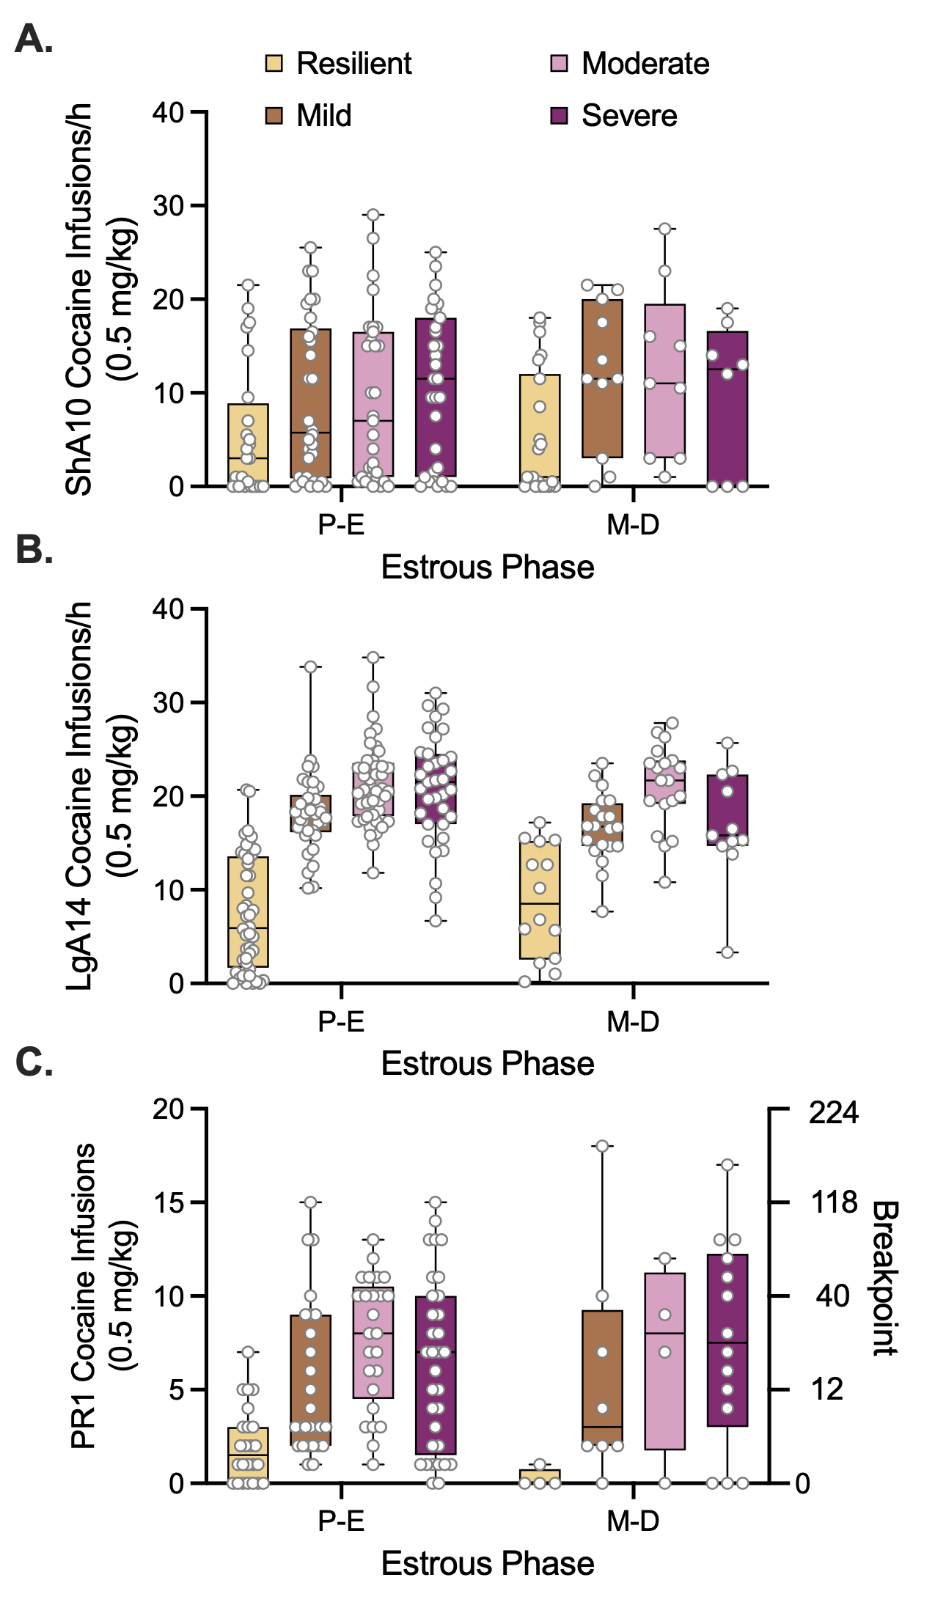
*Estrous phase is not associated with Addiction Index at various timepoints. (A)*** *At ShA10 (n = 167),* ***(B)*** *LGA14 (n = 213),* ***(C)*** *and**PR01 (n = 139), estrous phase and addiction index did not influence cocaine infusions.*

*
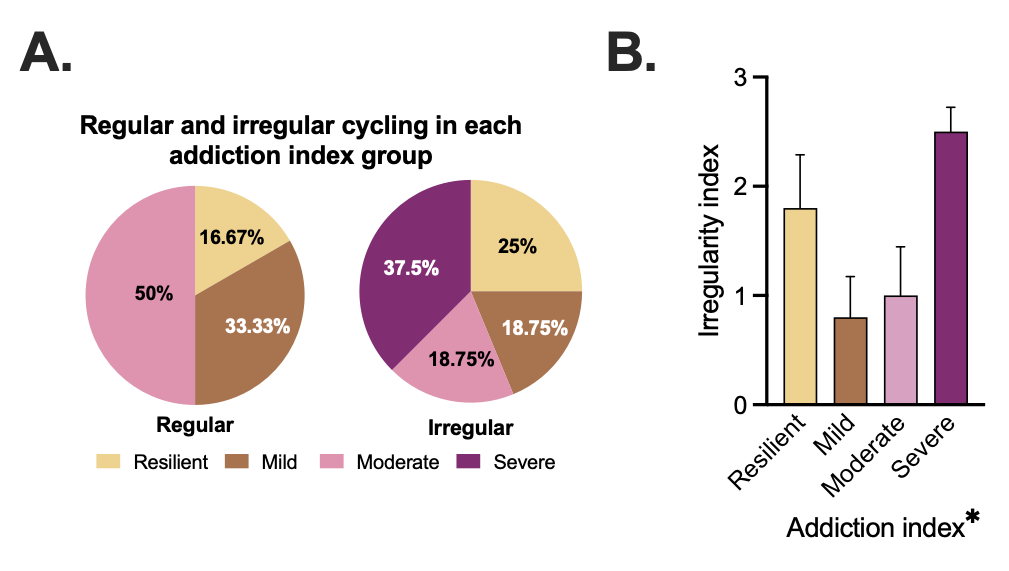
*

***Supplemental Figure 2. Irregular cycling and Addiction Index Associations.******(A)*** *Percentage of rats with regular (left) or irregular (right) cycling based on their addiction index. Regular: resilient (n =1), mild (n = 2), and moderate (n = 3). Irregular: resilient (n = 4), mild (n = 3), moderate (n = 3), severe (n =6).* ***(B)*** *Distribution of rats by the irregularity and addiction indices (*p < 0.05, One-Way ANOVA).*
